# Supplementary material
Source: PubMed Central journal article supplement (PMC9361183)
Supplement: jamainternmed-e223178-s002.pdf [file jamainternmed-e223178-s002.pdf]

## Data Sharing Statement

Piette. Patient-Centered Pain Care Using Artificial Intelligence and Mobile Health Tools. *JAMA Intern Med*. Published August 08, 2022. doi:10.1001/jamainternmed.2022.3178

### Data

**Data available:** No

### Additional Information

**Explanation for why data not available:** We did not seek or receive approval for this data sharing from our IRB
